# Supplementary material for: Inter-laboratory study on standardized MPS libraries: evaluation of performance, concordance, and sensitivity using mixtures and degraded DNA
Source: PubMed Central journal article supplement (PMC6949318; doi:10.1007/s00414-019-02201-2), 2019-11-19
Supplement: 414_2019_2201_MOESM1_ESM.pdf [file 414_2019_2201_MOESM1_ESM.pdf]

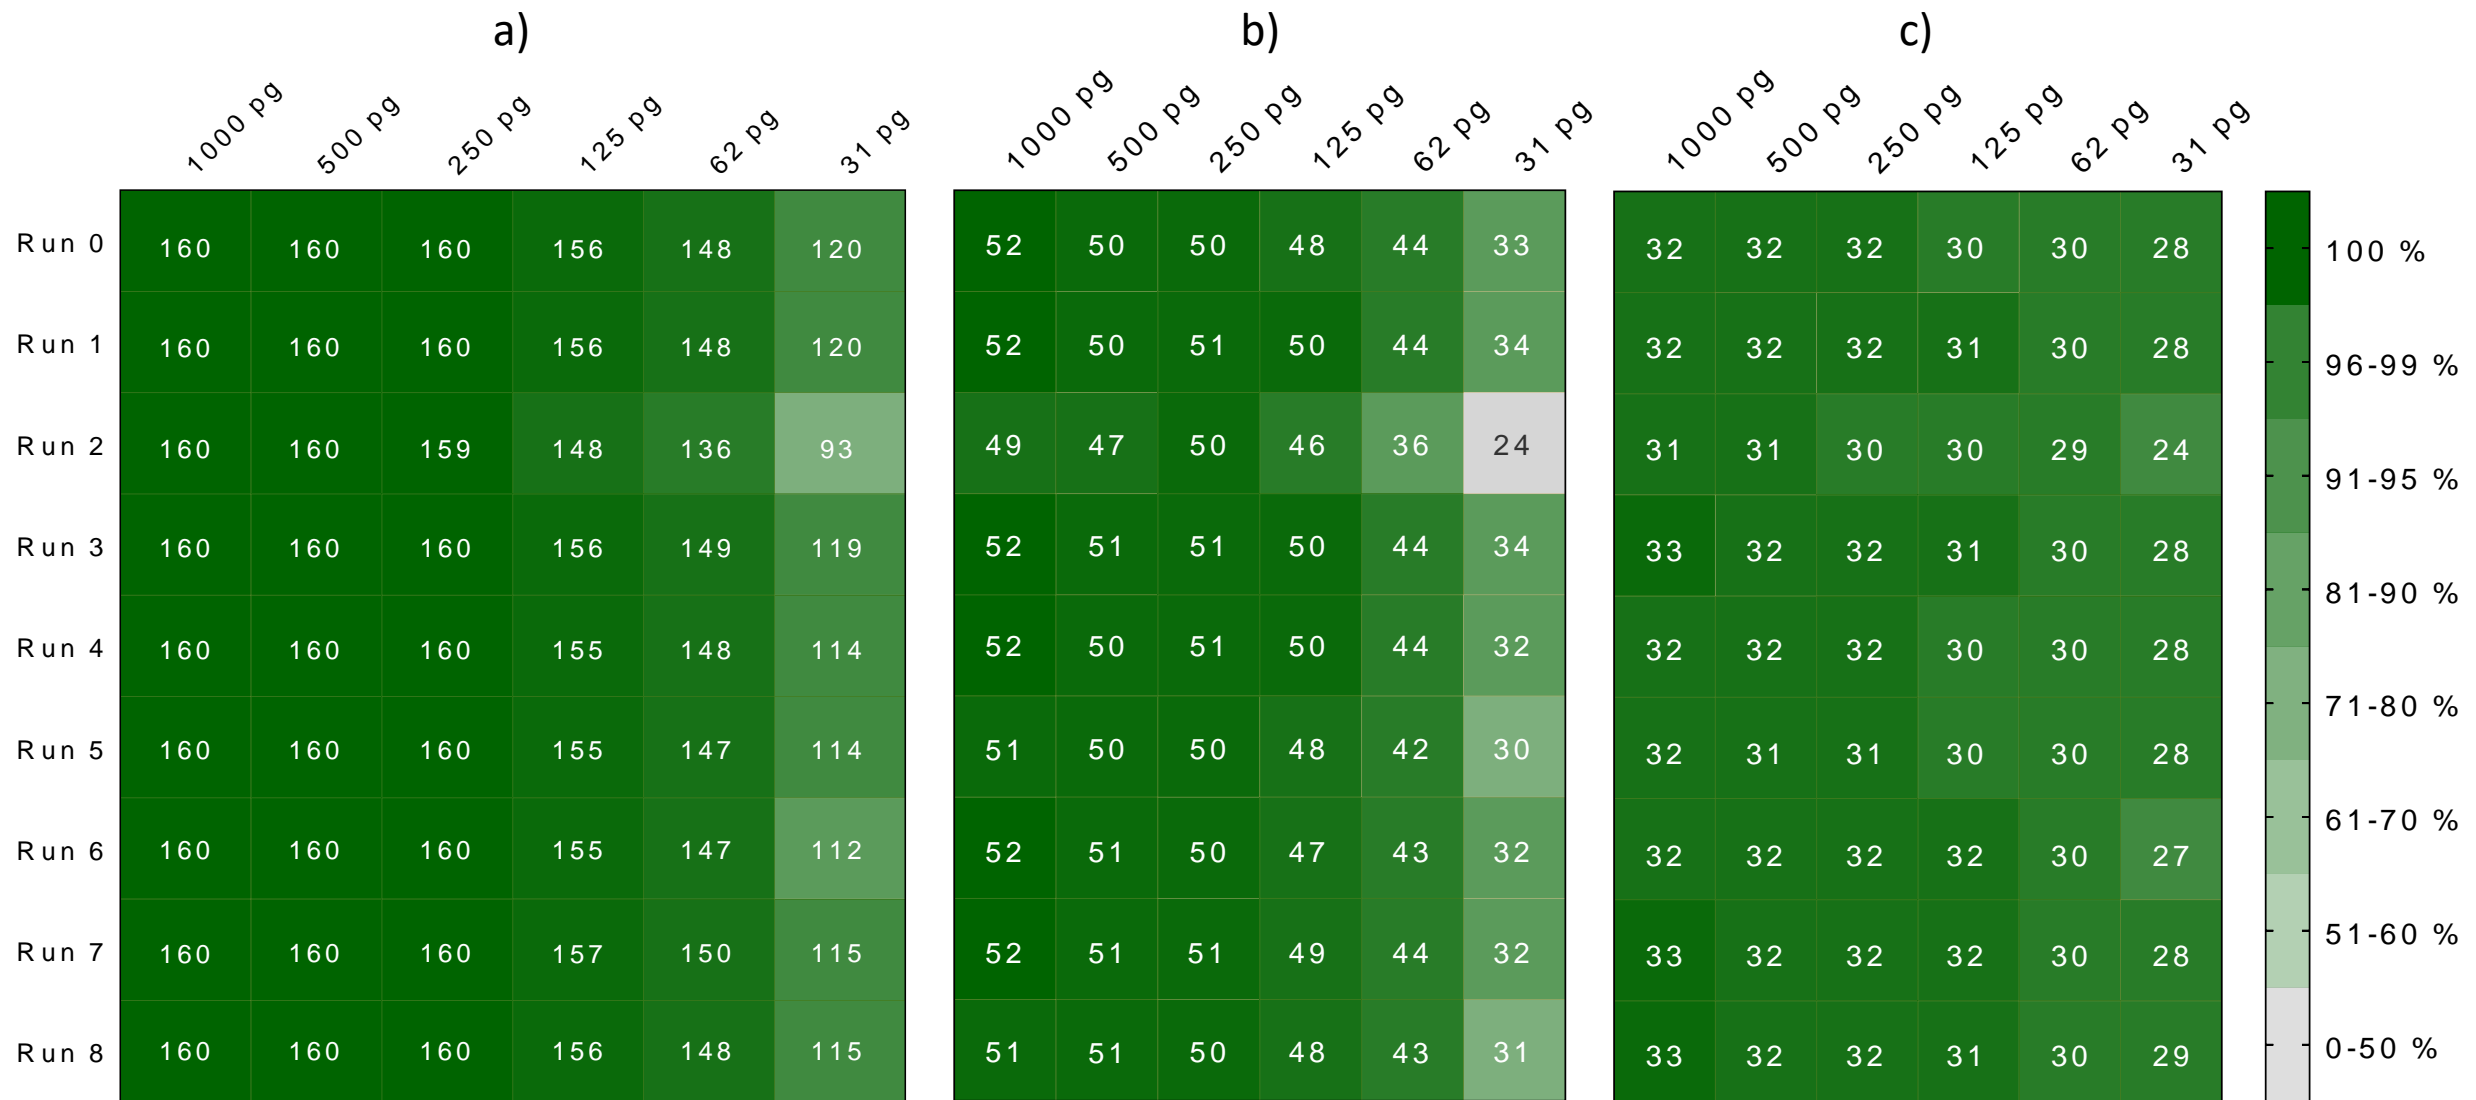

**Figure S1.** Sensitivity study heat maps for **a)** 27 aSTRs, **b)** 24 Y-STRs and **c)** 7 X-STRs included in the ForenSeq DNA Signature Prep Kit (Verogen). Numbers in cells depict the total number of alleles observed (two replicates) for each sequencing run that were correctly assigned to M500 depending on the DNA input. M500 was prepared at ratio 1:1 with control DNAs 2800M and 9947A. Serial dilution was prepared from 1000 pg down to 31 pg DNA input. Color gradient indicates the percentage of successfully called alleles from 100% (intensive green; full-profile) down to ≤ 50% (light-grey). Maximum number of alleles per replicate was 80, 26 and 17 for autosomal STRs (**a**), Y-STRs (**b**) and X-STRs (**c**), respectively.
