# Supplementary material for: Inter-laboratory study on standardized MPS libraries: evaluation of performance, concordance, and sensitivity using mixtures and degraded DNA
Source: PubMed Central journal article supplement (PMC6949318; doi:10.1007/s00414-019-02201-2), 2019-11-19
Supplement: 414_2019_2201_MOESM3_ESM.pdf [file 414_2019_2201_MOESM3_ESM.pdf]

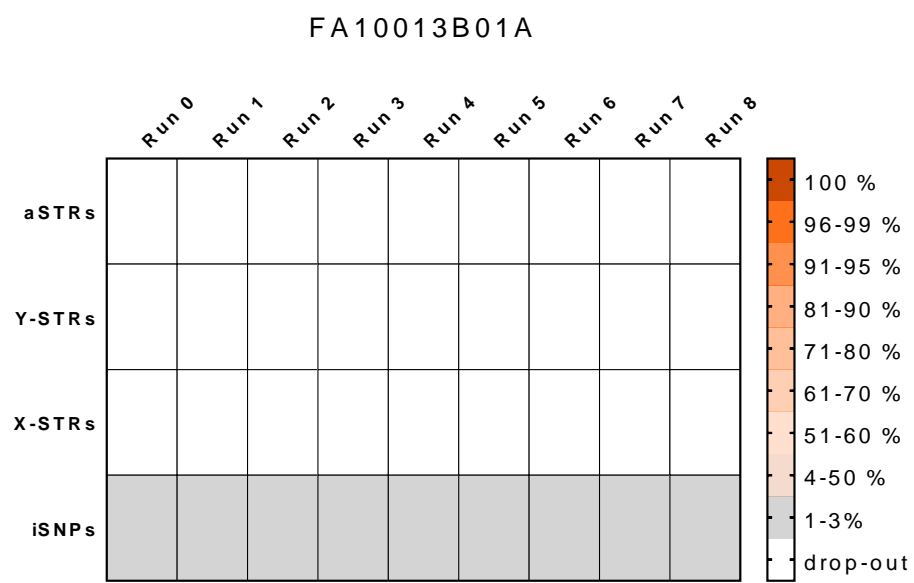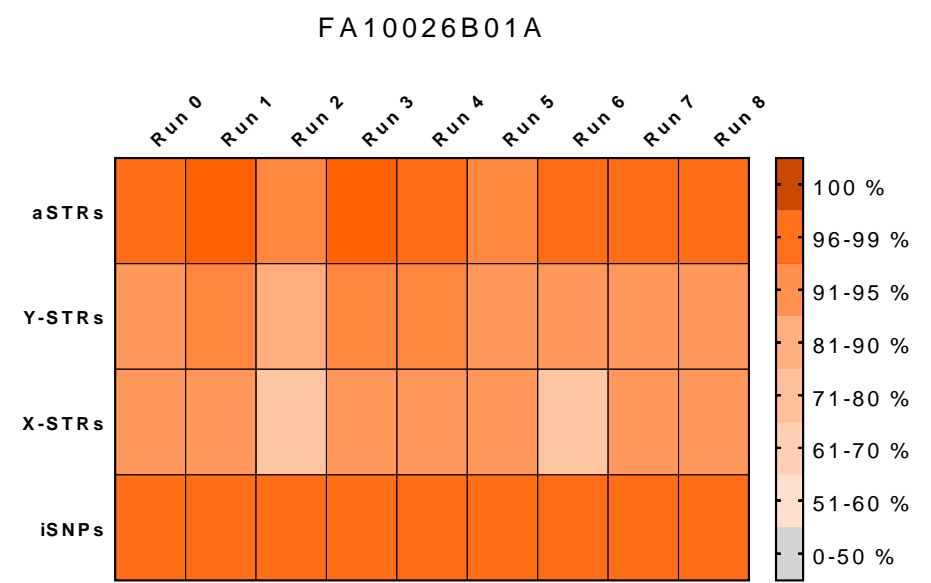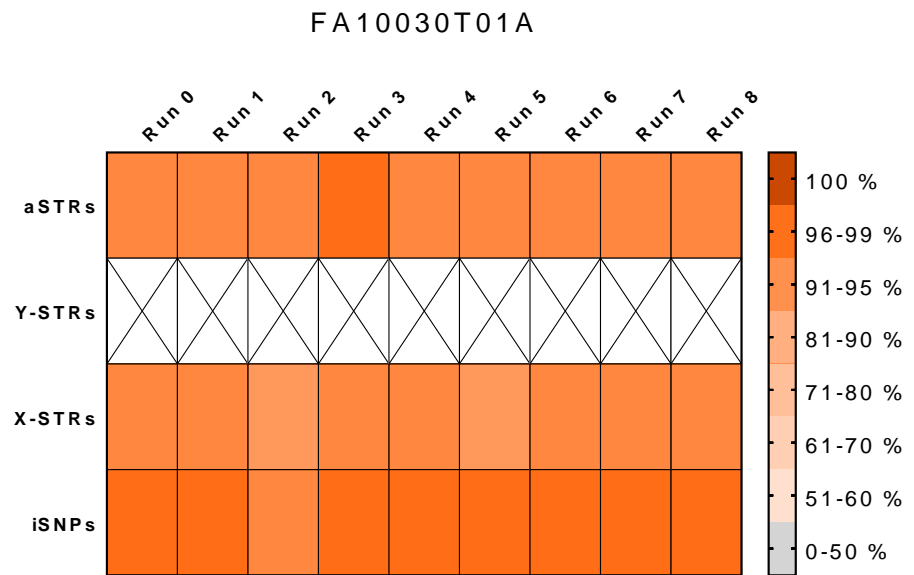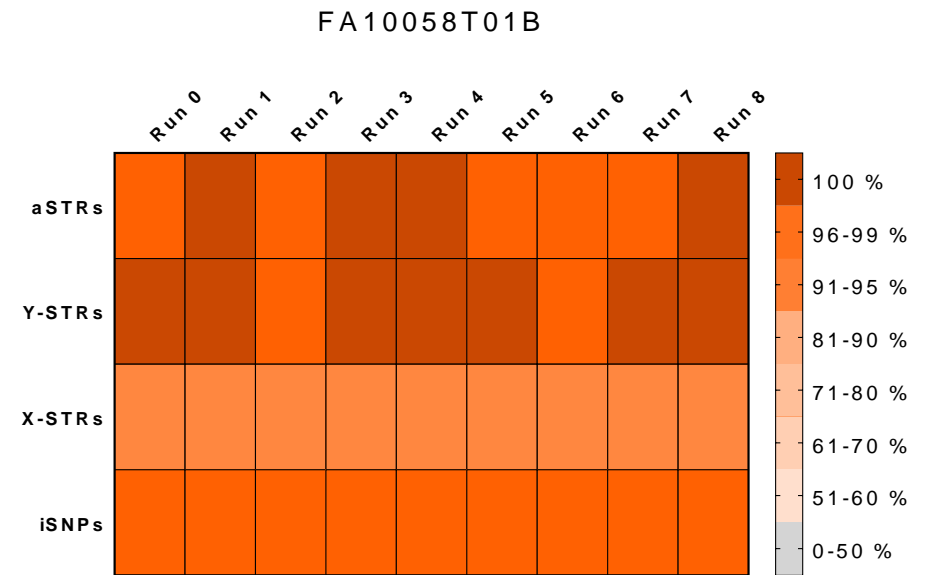

**Figure S3.** Ancient DNA heat maps for 27 autosomal STRs (aSTR), 24 Y-STRs, 7 X-STRs and 94 identity SNPs (iSNP) showing the percentage of concordantly typed forensic markers between all sequencing runs. Color gradient indicates the percentage of successfully typed alleles from 100% (intensive orange) down to  $\leq 50\%$  (light-grey), except for FA10013B01A. Color gradient for FA10013B01A indicates the percentage of successfully typed alleles 1-3% (light-grey) and drop-out (white).
